# Supplementary material for: An Attenuated Targeted-TNF Localizes to Tumors In Vivo and Regains Activity at the Site of Disease
Source: MDPI journal article supplement (doi:10.3390/ijms221810020), 2021-09-16
Supplement: s1 [file s1]

**An attenuated targeted-TNF localizes to tumors *in vivo* and regains activity at the site of disease**

Sheila Dakhel<sup>1</sup>, Christian Lizak<sup>1</sup>, Mattia Matasci<sup>1</sup>, Jacqueline Mock<sup>1</sup>, Alessandra Villa<sup>1</sup>,  
Dario Neri<sup>1,2</sup>, Samuele Cazzamalli<sup>1\*</sup>

1) Philochem AG, Libernstrasse 3, CH-8112 Otelfingen (Switzerland)

2) Philogen SpA, Piazza La Lizza 7, 53100 Siena (Italy)

\*) Corresponding author

phone: +41 43 544 88 19

fax: +41 43 544 88 09

samuele.cazzamalli@philogen.com

## Table of Contents

|                                                                                                                                               |           |
|-----------------------------------------------------------------------------------------------------------------------------------------------|-----------|
| <b>Cloning of L19-TNF mutants.....</b>                                                                                                        | <b>3</b>  |
| Table S1. Nucleotide sequence of primers used for site-specific mutagenesis .....                                                             | 3         |
| <b>Protein sequences of L19-TNF wild type and mutants .....</b>                                                                               | <b>4</b>  |
| <b>Protein Characterization.....</b>                                                                                                          | <b>8</b>  |
| SDS-PAGE.....                                                                                                                                 | 8         |
| Gel Filtration Analysis .....                                                                                                                 | 9         |
| Mass Spectrometry .....                                                                                                                       | 9         |
| Figure S1. Protein characterization of other L19-TNF mutants produced.....                                                                    | 10        |
| <b>Conditional <i>in vitro</i> cytotoxicity effect of L19-TNF mutants.....</b>                                                                | <b>11</b> |
| Table S4. IC <sub>50</sub> values of <i>in vitro</i> killing assay for other L19-hTNF mutants.....                                            | 11        |
| <b>Fitting and calculated kinetics constants for L19-TNF<sup>WT</sup> and its mutants.....</b>                                                | <b>12</b> |
| Table S5. L19-TNF <sup>WT</sup> -TNFR1 binding kinetics constants.....                                                                        | 12        |
| Table S6. L19-TNF <sup>I97A</sup> -TNFR1 binding kinetics constants .....                                                                     | 12        |
| <b>Biodistribution L19-TNF<sup>WT</sup>.....</b>                                                                                              | <b>13</b> |
| Figure S2. <i>In vivo</i> biodistribution with radioiodinated L19-TNF <sup>WT</sup> in BALB/c mice bearing WEHI-164 subcutaneous tumors. .... | 13        |
| <b><i>In vivo</i> MTD definition for L19-TNF products .....</b>                                                                               | <b>14</b> |
| Figure S3. Systemic MTD for L19-TNF <sup>wt</sup> and L19-TNF <sup>I97A</sup> in mice .....                                                   | 14        |
| <b>Statistical analysis of biodistribution experiments.....</b>                                                                               | <b>15</b> |
| Table S7. Statistical analyses of %ID/g of L19-TNF <sup>I97A</sup> (tumor vs. organs) .....                                                   | 15        |
| <b>Statistical analysis of therapy experiments .....</b>                                                                                      | <b>16</b> |
| Table S8. Statistical analyses of therapy experiments.....                                                                                    | 16        |
| Body Weight Change (%).....                                                                                                                   | 16        |
| Tumor Size (mg) .....                                                                                                                         | 16        |

## Cloning of L19-TNF mutants

**Table S1.** Nucleotide sequence of primers used for site-specific mutagenesis

|                                | Forward (5' → 3')                                                 | Reverse (5' → 3')                                                    |
|--------------------------------|-------------------------------------------------------------------|----------------------------------------------------------------------|
| <b>L19-TNF<sup>Y59F</sup></b>  | CAGAGGGCCTGTACCTCATCTT<br>CTCCCAGGTCCTCTTCAAGGG                   | CCCTTGAAGAGGACCTGGGAG<br>AAGATGAGGTACAGGCCCTCTG                      |
| <b>L19-TNF<sup>I97A</sup></b>  | AGGTCAACCTCCTCTCTGCCGC<br>CAAGAGCCCCTGCCAGAGGGA                   | TCCCTCTGGCAGGGGCTCTTGG<br>CGGCAGAGAGGAGGTTGACCT                      |
| <b>L19-TNF<sup>Q102N</sup></b> | CTGCCATCAAGAGCCCCTGCAA<br>TAGGGAGACCCAGAGGGGGC                    | GCCCCCTCTGGGGTCTCCCTAT<br>TGCAGGGGCTCTTGATGGCAG                      |
| <b>L19-TNF<sup>Y119S</sup></b> | AGCCCTGGTATGAGCCCATCAG<br>TCTGGGAGGGGTCTTCCAGCT                   | AGCTGGAAGACCCCTCCCAGA<br>CTGATGGGCTCATACCAGGGCT                      |
| <b>L19-TNF<sup>S147A</sup></b> | CGCGGATCCAGCTCTTCCGGCT<br>CATCGTCCAGCGGCGTCAGATC<br>ATCTTCTCGAACC | TTTTCCTTTTGCGGCCGCTTAT<br>CACAGGGCAATGATCCCAAAG<br>TAGACCTGCCCTGCCTC |
| <b>L19-TNF<sup>Q61S</sup></b>  | GCCTGTACCTCATCTACTCCTC<br>GGTCCTCTTCAAGGGCCAAGG                   | CCTTGGCCCTTGAAGAGGACCG<br>AGGAGTAGATGAGGTACAGGC                      |
| <b>L19-TNF<sup>Q61N</sup></b>  | GCCTGTACCTCATCTACTCCAA<br>CGTCCTCTTCAAGGGCCAAGG                   | CCTTGGCCCTTGAAGAGGACGT<br>TGGAGTAGATGAGGTACAGGC                      |
| <b>L19-TNF<sup>T72V</sup></b>  | AGGGCCAAGGCTGCCCCTCCGT<br>CCATGTGCTCCTCACCCACAC                   | GTGTGGGTGAGGAGCACATGG<br>ACGGAGGGGCAGCCTTGGCCCT                      |
| <b>L19-TNF<sup>V123A</sup></b> | AGCCCATCTATCTGGGAGGGGC<br>CTTCCAGCTGGAGAAGGGTGA                   | TCACCCTTCTCCAGCTGGAAG<br>GCCCCTCCCAGATAGATGGGCT                      |
| <b>L19-TNF<sup>Y151F</sup></b> | CGCGGATCCAGCTCTTCCGGCT<br>CATCGTCCAGCGGCGTCAGATC<br>ATCTTCTCGAACC | TTTTCCTTTTGCGGCCGCTTAT<br>CACAGGGCAATGATCCCAAAG<br>AAGACCTGCCCAGA    |

### **Protein sequences of L19-TNF wild type and mutants**

#### **L19-hTNF<sup>WT</sup>**

EVQLLES GGGLVQPGGSLRLSCAASGFTFSSFSMSWVRQAPGKGLEWVSSISGSSGTTY  
ADSVKGRFTISRDN SKNTLYLQMNSLRAEDTAVYYCAKPFYFDYWGQGTLVTVSSGDGS  
SGGSGGASEIVLTQSPGTLSPGERATLSCRASQSVSSSFLAWYQQKPGQAPRLLIYYAS  
SRATGIPDRFSGSGSGTDFTLTISRLEPEDFAVYYCQQTGRIPPTFGQGTKVEIKEFSSSSG  
SSSSGSSSSGVRSSSRTPSDKPAHVHVANPQAEGQLQWLNRRANALLANGVELRDNQLV  
VPSEGLYLIYSQVLFKGQGCPSTHVLLTHTISRIAVSYQTKVNLLSAIKSPCQRETPEGAEAK  
PWYEPIYLGGVFQLEKGDRLSAEINRPDYLDFAESGQVYFGIIAL

#### **L19-hTNF<sup>Y59F</sup>**

EVQLLES GGGLVQPGGSLRLSCAASGFTFSSFSMSWVRQAPGKGLEWVSSISGSSGTTY  
ADSVKGRFTISRDN SKNTLYLQMNSLRAEDTAVYYCAKPFYFDYWGQGTLVTVSSGDGS  
SGGSGGASEIVLTQSPGTLSPGERATLSCRASQSVSSSFLAWYQQKPGQAPRLLIYYAS  
SRATGIPDRFSGSGSGTDFTLTISRLEPEDFAVYYCQQTGRIPPTFGQGTKVEIKEFSSSSG  
SSSSGSSSSGVRSSSRTPSDKPAHVHVANPQAEGQLQWLNRRANALLANGVELRDNQLV  
VPSEGLYLI<sup>F</sup>SQVLFKGQGCPSTHVLLTHTISRIAVSYQTKVNLLSAIKSPCQRETPEGAEAK  
PWYEPIYLGGVFQLEKGDRLSAEINRPDYLDFAESGQVYFGIIAL

#### **L19-hTNF<sup>Q61S</sup>**

EVQLLES GGGLVQPGGSLRLSCAASGFTFSSFSMSWVRQAPGKGLEWVSSISGSSGTTY  
ADSVKGRFTISRDN SKNTLYLQMNSLRAEDTAVYYCAKPFYFDYWGQGTLVTVSSGDGS  
SGGSGGASEIVLTQSPGTLSPGERATLSCRASQSVSSSFLAWYQQKPGQAPRLLIYYAS  
SRATGIPDRFSGSGSGTDFTLTISRLEPEDFAVYYCQQTGRIPPTFGQGTKVEIKEFSSSSG  
SSSSGSSSSGVRSSSRTPSDKPAHVHVANPQAEGQLQWLNRRANALLANGVELRDNQLV  
VPSEGLYLIYS<sup>S</sup>VLFKGQGCPSTHVLLTHTISRIAVSYQTKVNLLSAIKSPCQRETPEGAEAK  
PWYEPIYLGGVFQLEKGDRLSAEINRPDYLDFAESGQVYFGIIAL

L19-hTNF<sup>Q61N</sup>

EVQLLES GGGLVQPGGSLRLSCAASGFTFSSFSMSWVRQAPGKGLEWVSSISGSSGTYY  
ADSVKGRFTISRDN SKNTLYLQMNSLRAEDTAVYYCAKPFYFDYWGQGTLVTVSSGDGS  
SGGSGGASEIVLTQSPGTLSPGERATLSCRASQSVSSSFLAWYQQKPGQAPRLLIYYAS  
SRATGIPDRFSGSGSGTDFTLTISRLEPEDFAVYYCQQTGRIPPTFGQG TKVEIKEFSSSSG  
SSSSGSSSSGVRSSSRTPSDKPV AHVVANPQAEGQLQWLNRRANALLANGVELRDNQLV  
VPSEGLYLIYS NVLFKGQGCPSTHVLLTHTISRIAVSYQTKVNLLSAIKSPCQRETPEGAEAK  
PWYEPIYLGGVFQLEKGDRLSAEINRPDYLDFAESGQVYFGIIAL

L19-hTNF<sup>T72V</sup>

EVQLLES GGGLVQPGGSLRLSCAASGFTFSSFSMSWVRQAPGKGLEWVSSISGSSGTYY  
ADSVKGRFTISRDN SKNTLYLQMNSLRAEDTAVYYCAKPFYFDYWGQGTLVTVSSGDGS  
SGGSGGASEIVLTQSPGTLSPGERATLSCRASQSVSSSFLAWYQQKPGQAPRLLIYYAS  
SRATGIPDRFSGSGSGTDFTLTISRLEPEDFAVYYCQQTGRIPPTFGQG TKVEIKEFSSSSG  
SSSSGSSSSGVRSSSRTPSDKPV AHVVANPQAEGQLQWLNRRANALLANGVELRDNQLV  
VPSEGLYLIYSQVLFKGQGCP SVHVLLTHTISRIAVSYQTKVNLLSAIKSPCQRETPEGAEAK  
PWYEPIYLGGVFQLEKGDRLSAEINRPDYLDFAESGQVYFGIIAL

L19-hTNF<sup>I97A</sup>

EVQLLES GGGLVQPGGSLRLSCAASGFTFSSFSMSWVRQAPGKGLEWVSSISGSSGTYY  
ADSVKGRFTISRDN SKNTLYLQMNSLRAEDTAVYYCAKPFYFDYWGQGTLVTVSSGDGS  
SGGSGGASEIVLTQSPGTLSPGERATLSCRASQSVSSSFLAWYQQKPGQAPRLLIYYAS  
SRATGIPDRFSGSGSGTDFTLTISRLEPEDFAVYYCQQTGRIPPTFGQG TKVEIKEFSSSSG  
SSSSGSSSSGVRSSSRTPSDKPV AHVVANPQAEGQLQWLNRRANALLANGVELRDNQLV  
VPSEGLYLIYSQVLFKGQGCPSTHVLLTHTISRIAVSYQTKVNLLSA AKSPCQRETPEGAEA  
KPWEPIYLGGVFQLEKGDRLSAEINRPDYLDFAESGQVYFGIIAL

L19-hTNF<sup>Q102N</sup>

EVQLLES GGGLVQPGGSLRLSCAASGFTFSSFSMSWVRQAPGKGLEWVSSISGSSGTITYY  
ADSVKGRFTISRDN SKNTLYLQMNSLRAEDTAVYYCAKPFYFDYWGQGTLVTVSSGDGS  
SGGSGGASEIVLTQSPGTL SLSPGERATLSCRASQSVSSSFLAWYQQKPGQAPRLLIYYAS  
SRATGIPDRFSGSGSGTDFTLTISRLEPEDFAVYYCQQTGRIPPTFGQG TKVEIKEFSSSSG  
SSSSGSSSSGVRSSSRTPSDKPV AHVVANPQAEGQLQWLNRRANALLANGVELRDNQLV  
VPSEGLYLIYSQVLFKGQGCPSTHVLLTHTISRIAVSYQTKVNLLSAIKSPC **N**RETPEGAEAK  
PWYEPIYLGGVFQLEKGDRLSAEINRPDYLDFAESGQVYFGIIAL

L19-hTNF<sup>Y119S</sup>

EVQLLES GGGLVQPGGSLRLSCAASGFTFSSFSMSWVRQAPGKGLEWVSSISGSSGTITYY  
ADSVKGRFTISRDN SKNTLYLQMNSLRAEDTAVYYCAKPFYFDYWGQGTLVTVSSGDGS  
SGGSGGASEIVLTQSPGTL SLSPGERATLSCRASQSVSSSFLAWYQQKPGQAPRLLIYYAS  
SRATGIPDRFSGSGSGTDFTLTISRLEPEDFAVYYCQQTGRIPPTFGQG TKVEIKEFSSSSG  
SSSSGSSSSGVRSSSRTPSDKPV AHVVANPQAEGQLQWLNRRANALLANGVELRDNQLV  
VPSEGLYLIYSQVLFKGQGCPSTHVLLTHTISRIAVSYQTKVNLLSAIKSPC **Q**RETPEGAEAK  
PWYEPI **S**LGGVFQLEKGDRLSAEINRPDYLDFAESGQVYFGIIAL

L19-hTNF<sup>V123A</sup>

EVQLLES GGGLVQPGGSLRLSCAASGFTFSSFSMSWVRQAPGKGLEWVSSISGSSGTITYY  
ADSVKGRFTISRDN SKNTLYLQMNSLRAEDTAVYYCAKPFYFDYWGQGTLVTVSSGDGS  
SGGSGGASEIVLTQSPGTL SLSPGERATLSCRASQSVSSSFLAWYQQKPGQAPRLLIYYAS  
SRATGIPDRFSGSGSGTDFTLTISRLEPEDFAVYYCQQTGRIPPTFGQG TKVEIKEFSSSSG  
SSSSGSSSSGVRSSSRTPSDKPV AHVVANPQAEGQLQWLNRRANALLANGVELRDNQLV  
VPSEGLYLIYSQVLFKGQGCPSTHVLLTHTISRIAVSYQTKVNLLSAIKSPC **Q**RETPEGAEAK  
PWYEPIYLGG **A**FQLEKGDRLSAEINRPDYLDFAESGQVYFGIIAL

L19-hTNF<sup>S147A</sup>

EVQLLES GGGLVQPGGSLRLSCAASGFTFSSFSMSWVRQAPGKGLEWVSSISGSSGTTY  
ADSVKGRFTISRDN SKNTLYLQMNSLRAEDTAVYYCAKPFYFDYWGQGTLVTVSSGDGS  
SGGSGGASEIVLTQSPGTL SLSPGERATLSCRASQSVSSSFLAWYQQKPGQAPRLLIYYAS  
SRATGIPDRFSGSGSGTDFTLTISRLEPEDFAVYYCQQTGRIPPTFGQGTKVEIKEFSSSSG  
SSSSGSSSSGVRSSSRTPSDKPV AHVVANPQAEGQLQWLNRRANALLANGVELRDNQLV  
VPSEGLYLIYSQVLFKGQGCPSTHVLLTHTISRIAVSYQTKVNLLSAIKSPCQRETPEGAEAK  
PWYEPIYLGGVFQLEKGDRLSAEINRPDYLDFAEAGQVYFGIIAL

L19-hTNF<sup>Y151F</sup>

EVQLLES GGGLVQPGGSLRLSCAASGFTFSSFSMSWVRQAPGKGLEWVSSISGSSGTTY  
ADSVKGRFTISRDN SKNTLYLQMNSLRAEDTAVYYCAKPFYFDYWGQGTLVTVSSGDGS  
SGGSGGASEIVLTQSPGTL SLSPGERATLSCRASQSVSSSFLAWYQQKPGQAPRLLIYYAS  
SRATGIPDRFSGSGSGTDFTLTISRLEPEDFAVYYCQQTGRIPPTFGQGTKVEIKEFSSSSG  
SSSSGSSSSGVRSSSRTPSDKPV AHVVANPQAEGQLQWLNRRANALLANGVELRDNQLV  
VPSEGLYLIYSQVLFKGQGCPSTHVLLTHTISRIAVSYQTKVNLLSAIKSPCQRETPEGAEAK  
PWYEPIYLGGVFQLEKGDRLSAEINRPDYLDFAESGQVFFGIIAL

## **Protein Characterization**

### **SDS-PAGE**

Protein samples were diluted to 0.2-0.3 mg/mL in PBS and mixed with either reducing or non-reducing 5x Loading buffer. Samples were denatured 5' at 95 °C and loaded on NuPAGE 4-12% Bis-Tris Gel (Novex™ by Life Technologies). 1x MES NuPAGE (Novex™ by Life Technologies) was used as running buffer and electrophoresis was performed at 180 V, 110 mA for 1h. Gel was rinsed with deionized water and stained in Coomassie blue for 15-20' on an orbital shaker. Staining solution was discarded and the gel was rinsed 3 times with deionized water and immersed in destaining solution (10% acetic acid/30% methanol/mQ water) for 3-12h on an orbital shaker. Destaining solution was discarded and recycled, gel was rinsed with deionized water and a picture of the gel was taken. Recipes for the 5X Loading buffer and Coomassie blue stain are as described in Table S2 and S3:

| <b>100mL, 5X non-red Loading Buffer</b> |              |
|-----------------------------------------|--------------|
| Tris-HCl (250mM, pH 6.8)                | 20.8 mL      |
| Glycerol                                | 33.3 mL      |
| SDS                                     | 6.6 g        |
| Bromophenol blue                        | 66 mg        |
| mQ water                                | up to 100 mL |

Table S2. 5X Loading buffer recipe

| <b>1L Coomassie blue</b>              |           |
|---------------------------------------|-----------|
| PlusOne Coomassie PhastGel Blue R-350 | 2 tablets |
| Methanol                              | 400 mL    |
| Acetic Acid                           | 100 mL    |
| mQ water                              | 500 mL    |

Table S3. Coomassie blue recipe



### **Gel Filtration Analysis**

100  $\mu$ L of diluted sample (final concentration 0.1-0.5 mg/mL) were loaded on FPLC (Äkta, GE Healthcare) and protein were separated by a Superdex200 Increase 10/300 GL column (GE Healthcare) previously equilibrated with 1 CV PBS, using PBS as mobile phase at a flow rate of 0.6 mL/min (column pressure limit set at 5 MPa). Proteins were detected by an UV-detector at a wavelength of 280 nm.

### **Mass Spectrometry**

Samples were diluted to about 0.1 mg/mL and LC-MS was performed on a Waters Xevo G2XS Qtof instrument (ESI-ToF-MS) coupled to a Waters Acquity UPLC H-Class System using a 2.1  $\times$  50 mm Acquity BEH300 C4 1.7  $\mu$ m column (Waters). 0.1% FA in water (solvent A) and 0.1% FA in MeCN (solvent B) were used as mobile phase at a flow rate of 0.4 mL/min. Gradient was programmed as follows: after 1.5 min isocratic with 95% solvent A, stepwise change from 95% solvent A to 95% solvent B in 4.5 min (10% increase every 0.5 min), back to 95% solvent A in 0.5 min, linearly to 95% solvent B and back to 95% solvent A in 2.25 min (last step repeated twice).

**Figure S1.** Protein characterization of other L19-TNF mutants produced

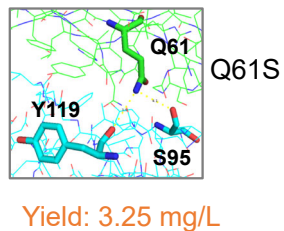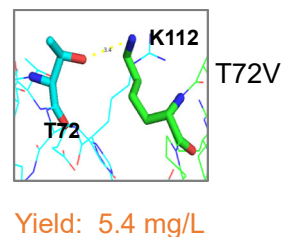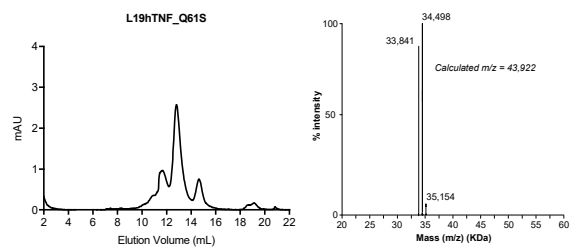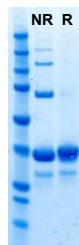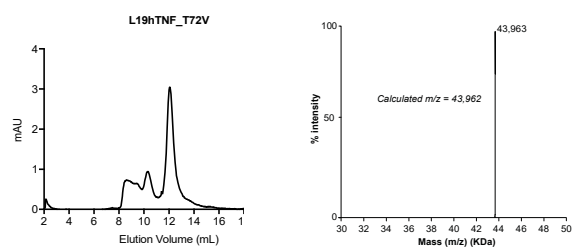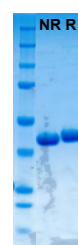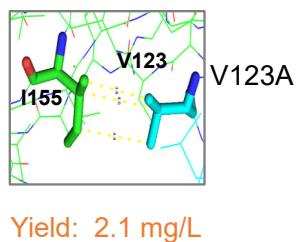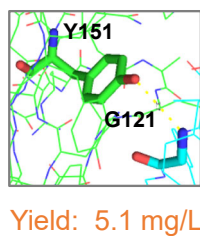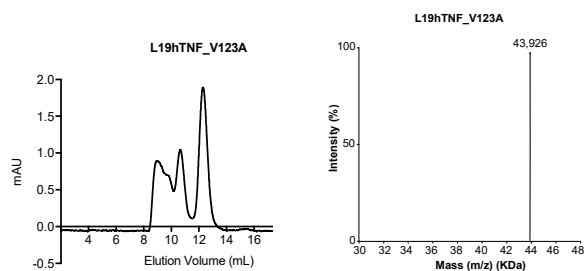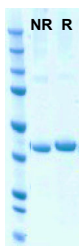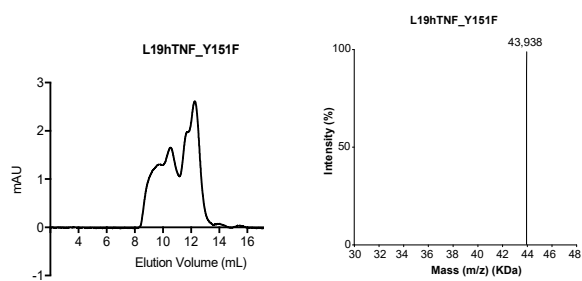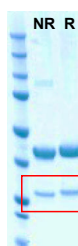

**Conditional *in vitro* cytotoxicity effect of L19-TNF mutants**

**Table S4.** IC50 values of *in vitro* killing assay for other L19-hTNF mutants

|                                | No EDB coating (M) | 100nM EDB coating (M) |
|--------------------------------|--------------------|-----------------------|
| <b>L19-TNF<sup>wt</sup></b>    | 6.219e-011         | 1.408e-011            |
| <b>L19-TNF<sup>T72V</sup></b>  | 7.768e-011         | 4.772e-011            |
| <b>L19-TNF<sup>V123A</sup></b> | 1.801e-011         | 3.298e-011            |
| <b>L19-TNF<sup>Y151F</sup></b> | 7.127e-012         | 2.229e-011            |

### **Fitting and calculated kinetics constants for L19-TNF<sup>WT</sup> and its mutants**

The data binding kinetics were calculated by global-fitting using the BIAcore Evaluation Software 3.2 RCI (GE Healthcare) applying a 1:1 Langmuir binding model.

**Table S5.** L19-TNF<sup>WT</sup>-TNFR1 binding kinetics constants

|                   | ka (1/Ms) | kd (1/s) | Rmax (RU) | RI (RU) | Conc of analyte | KA (1/M) | KD (M)  | Req (RU) | kobs (1/s) | Chi2  |
|-------------------|-----------|----------|-----------|---------|-----------------|----------|---------|----------|------------|-------|
|                   |           |          |           |         |                 |          |         |          |            | 0.378 |
| Subtracted Fc=2-1 | 9.09e4    | 1.07e-3  | 74.2      | 0.97    | 250n            | 8.5e7    | 1.18e-8 | 70.9     | 0.0238     |       |
| Subtracted Fc=2-1 | 1.08e5    | 1.11e-3  | 88.7      | -0.913  | 500n            | 9.72e7   | 1.03e-8 | 86.9     | 0.0551     |       |
| Subtracted Fc=2-1 | 1.1e5     | 1.58e-3  | 101       | -3.48   | 1000n           | 6.98e7   | 1.43e-8 | 99.9     | 0.112      |       |

**Table S6.** L19-TNF<sup>I97A</sup>-TNFR1 binding kinetics constants

|                   | ka (1/Ms) | kd (1/s) | Rmax (RU) | RI (RU) | Conc of analyte | KA (1/M) | KD (M)  | Req (RU) | kobs (1/s) | Chi2  |
|-------------------|-----------|----------|-----------|---------|-----------------|----------|---------|----------|------------|-------|
|                   |           |          |           |         |                 |          |         |          |            | 0.154 |
| Subtracted Fc=2-1 | 1.18e5    | 0.0606   | 73.1      | -5.68   | 250n            | 1.95e6   | 5.13e-7 | 24       | 0.0902     |       |
| Subtracted Fc=2-1 | 1.4e5     | 0.0519   | 65.6      | -2.07   | 500n            | 2.71e6   | 3.69e-7 | 37.7     | 0.122      |       |
| Subtracted Fc=2-1 | 1.49e5    | 0.0529   | 71.1      | -2.77   | 1000n           | 2.83e6   | 3.54e-7 | 52.5     | 0.202      |       |

### **Biodistribution L19-TNF<sup>WT</sup>**

Radioiodinated L19-TNF<sup>WT</sup> (2 µg) was injected into the lateral tail vein of a single mice bearing WEHI-164 tumor. The animal was killed 24 h after injection, and organs were excised, weighed and radioactivity was measured using a Cobra γ counter (Packard, Meriden, CT, USA). The radioactivity of the organ and the tumor was expressed as the percentage of injected dose per gram of tissue (%ID/g ± standard error, n = 1).

**Figure S2.** *In vivo* biodistribution with radioiodinated L19-TNF<sup>WT</sup> in BALB/c mice bearing WEHI-164 subcutaneous tumors.

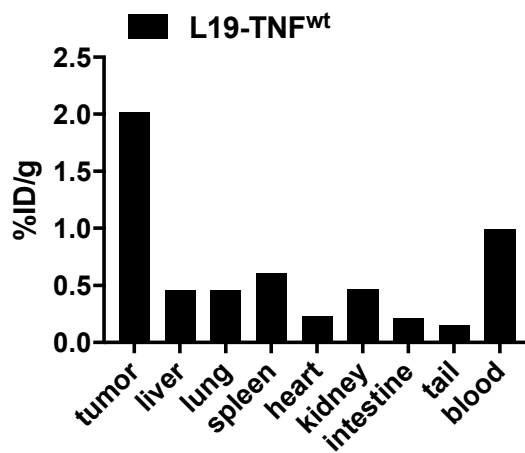

### **In vivo MTD definition for L19-TNF products**

A dose escalation study with L19-TNF wild type and the mutant I97A was performed to define the corresponding maximum tolerated dose (MTD) of each molecule. Mice were subcutaneously-grafted with WEHI-164 tumor ( $2.5 \times 10^6$  cells/animal). Tumors were grown up to 100 mm<sup>3</sup> before the starting the injections. Three different injections were given to the mouse receiving 7.5 µg while a single intravenous injection for the higher doses could be administered due to very severe toxicity. Body weight loss (BWL) of the animals was measured daily (n = 1/dose/molecule) in order to determine toxicity induced by the molecules (represented in the graph by + = <15% BWL or ++ = > 15% BWL). More than 15% of BWL was a termination criteria of the study.

**Figure S3.** Systemic MTD for L19-TNF<sup>wt</sup> and L19-TNF<sup>I97A</sup> in mice

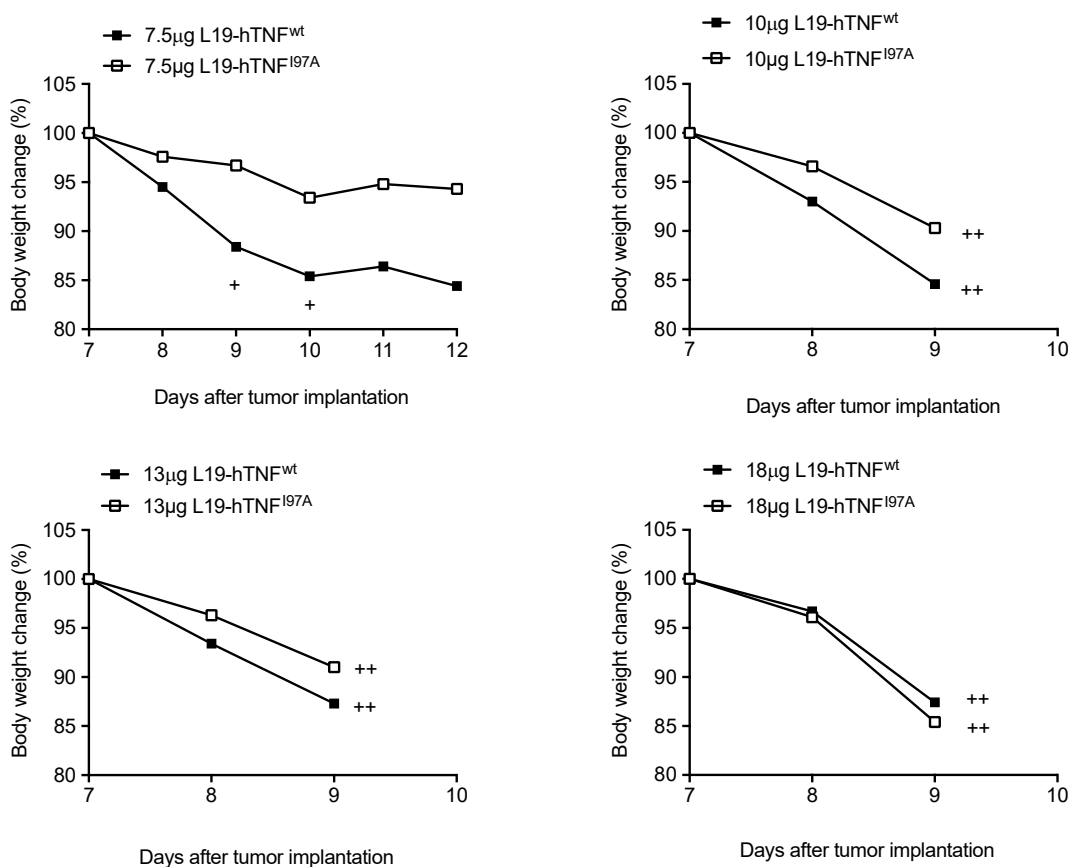

### **Statistical analysis of biodistribution experiments**

Differences in %ID/g of tumor and normal organs were compared using the t-test analysis with one-tailed p-value of Graphpad Prism 7 (La Jolla, CA, USA).

**Table S7. Statistical analyses of %ID/g of L19-TNF<sup>I97A</sup> (tumor vs. organs)**

#### **%ID/g L19-TNF<sup>I97A</sup>**

|                 |                             |
|-----------------|-----------------------------|
| Tumor-Liver     | p < 0.05                    |
| Tumor-Lung      | p < 0.05                    |
| Tumor-Spleen    | p < 0.05                    |
| Tumor-Heart     | p < 0.05                    |
| Tumor-Kidney    | p < 0.05                    |
| Tumor-Intestine | p < 0.01                    |
| Tumor-Tail      | p < 0.01                    |
| Tumor-Blood     | non-significant differences |

### **Statistical analysis of therapy experiments**

Differences in tumor volume and body weight between therapeutic groups were compared using the two-way ANOVA analysis with Bonferroni post-test of Graphpad Prism 7 (La Jolla, CA, USA). Days are counted after tumor implantation (\*p < 0.05, \*\*p < 0.01, \*\*\*p < 0.001, \*\*\*\*p < 0.0001).

**Table S8. Statistical analyses of therapy experiments.**

#### **Body Weight Change (%)**

L19-TNF<sup>wt</sup> (375 µg/Kg) vs L19-TNF<sup>I97A</sup> (375 µg/Kg).

|        |                             |
|--------|-----------------------------|
| day 5  | non-significant differences |
| day 6  | non-significant differences |
| day 7  | p < 0.001                   |
| day 8  | p < 0.0001                  |
| day 9  | p < 0.0001                  |
| day 10 | p < 0.01                    |
| day 11 | p < 0.01                    |
| day 12 | p < 0.05                    |

#### **Tumor Size (mg)**

L19-TNF<sup>wt</sup> (375 µg/Kg) vs L19-TNF<sup>I97A</sup> (375 µg/Kg).

From day 5 until day 12      non-significant differences
